# Supplementary material for: Essential Oil Compounds in Combination with Conventional Antibiotics for Dermatology
Source: MDPI journal article supplement (doi:10.3390/molecules29061225), 2024-03-08

# Essential oil compounds in combination with conventional antibiotics for dermatology

S. Simbu<sup>1</sup>, A. Orchard<sup>1</sup>, S. van Vuuren<sup>1</sup>

<sup>1</sup> Department of Pharmacy and Pharmacology, Faculty of Health Sciences, University of the Witwatersrand, Parktown, South Africa, 2193

## Supplementary Data

**Table S1.** Synergistic interactions against *S. aureus*.

| Isobologram plot number | Ratio volumes (µl) (Antibiotic: EOC) | Amoxicillin + Carvacrol                  |                                   | Gentamicin + Carvacrol                   |                                   | Miconazole + Carvacrol                   |                                   | Miconazole + Cinnamaldehyde              |                                   |
|-------------------------|--------------------------------------|------------------------------------------|-----------------------------------|------------------------------------------|-----------------------------------|------------------------------------------|-----------------------------------|------------------------------------------|-----------------------------------|
|                         |                                      | MIC of antibiotic in combination (µg/mL) | MIC of EOC in combination (µg/mL) | MIC of antibiotic in combination (µg/mL) | MIC of EOC in combination (µg/mL) | MIC of antibiotic in combination (µg/mL) | MIC of EOC in combination (µg/mL) | MIC of antibiotic in combination (µg/mL) | MIC of EOC in combination (µg/mL) |
| 1                       | 90:10                                | 1.13                                     | 400                               | 1.13                                     | 400                               | 1.13                                     | 400                               | 1.13                                     | 400                               |
| 2                       | 80:20                                | 0.50                                     | 400                               | 0.50                                     | 400                               | 0.50                                     | 400                               | 0.50                                     | 400                               |
| 3                       | 70:30                                | 0.44                                     | 600                               | 0.22                                     | 300                               | 0.22                                     | 300                               | 0.22                                     | 300                               |
| 4                       | 60:40                                | 0.19                                     | 400                               | 0.09                                     | 200                               | 0.19                                     | 400                               | 0.09                                     | 200                               |
| 5                       | 50:50                                | 0.16                                     | 500                               | 0.08                                     | 250                               | 0.08                                     | 250                               | 0.04                                     | 125                               |
| 6                       | 40:60                                | 0.06                                     | 500                               | 0.06                                     | 300                               | 0.06                                     | 300                               | 0.03                                     | 150                               |
| 7                       | 30:70                                | 0.05                                     | 350                               | 0.09                                     | 700                               | 0.05                                     | 350                               | 0.05                                     | 350                               |
| 8                       | 20:80                                | 0.06                                     | 800                               | 0.13                                     | 1600                              | 0.06                                     | 800                               | 0.03                                     | 400                               |
| 9                       | 10:90                                | 0.06                                     | 1800                              | 0.06                                     | 1800                              | 0.03                                     | 900                               | 0.02                                     | 450                               |

**Table S2.** Synergistic interactions against *S. epidermidis*, *C. acnes* and *P. aeruginosa*.

| Isobologram<br>plot number | Ratio<br>volumes (µl)<br>(Antibiotic:<br>EOC) | <i>S. epidermidis</i> (ATCC 12228)     |                                 |                                        |                                 | <i>C. acnes</i> (ATCC 11827)           |                                 | <i>P. aeruginosa</i> (ATCC 27853)      |                                 |
|----------------------------|-----------------------------------------------|----------------------------------------|---------------------------------|----------------------------------------|---------------------------------|----------------------------------------|---------------------------------|----------------------------------------|---------------------------------|
|                            |                                               | Erythromycin<br>+ Cinnamaldehyde       |                                 | Miconazole<br>+ Cinnamaldehyde         |                                 | Amoxicillin<br>+ Eugenol               |                                 | Ciprofloxacin<br>+ Cinnamaldehyde      |                                 |
|                            |                                               | MIC of<br>antibiotic in<br>combination | MIC of<br>EOC in<br>combination |
|                            |                                               | (µg/mL)                                | (µg/mL)                         | (µg/mL)                                | (µg/mL)                         | (µg/mL)                                | (µg/mL)                         | (µg/mL)                                | (µg/mL)                         |
| 1                          | 90:10                                         | 0.28                                   | 100                             | 1.13                                   | 400                             | 0.14                                   | 50                              | 0.29                                   | 100                             |
| 2                          | 80:20                                         | 0.25                                   | 200                             | 0.50                                   | 400                             | 0.13                                   | 100                             | 0.13                                   | 100                             |
| 3                          | 70:30                                         | 0.11                                   | 150                             | 0.22                                   | 300                             | 0.05                                   | 75                              | 0.11                                   | 150                             |
| 4                          | 60:40                                         | 0.09                                   | 200                             | 0.09                                   | 200                             | 0.05                                   | 100                             | 0.05                                   | 100                             |
| 5                          | 50:50                                         | 0.04                                   | 125                             | 0.04                                   | 125                             | 0.04                                   | 125                             | 0.04                                   | 125                             |
| 6                          | 40:60                                         | 0.03                                   | 150                             | 0.03                                   | 150                             | 0.03                                   | 150                             | 0.03                                   | 150                             |
| 7                          | 30:70                                         | 0.05                                   | 350                             | 0.05                                   | 350                             | 0.02                                   | 175                             | 0.02                                   | 175                             |
| 8                          | 20:80                                         | 0.06                                   | 800                             | 0.06                                   | 800                             | 0.03                                   | 400                             | 0.03                                   | 400                             |
| 9                          | 10:90                                         | 0.06                                   | 1800                            | 0.03                                   | 900                             | 0.03                                   | 900                             | 0.03                                   | 900                             |

**Figure S1.** Study design.

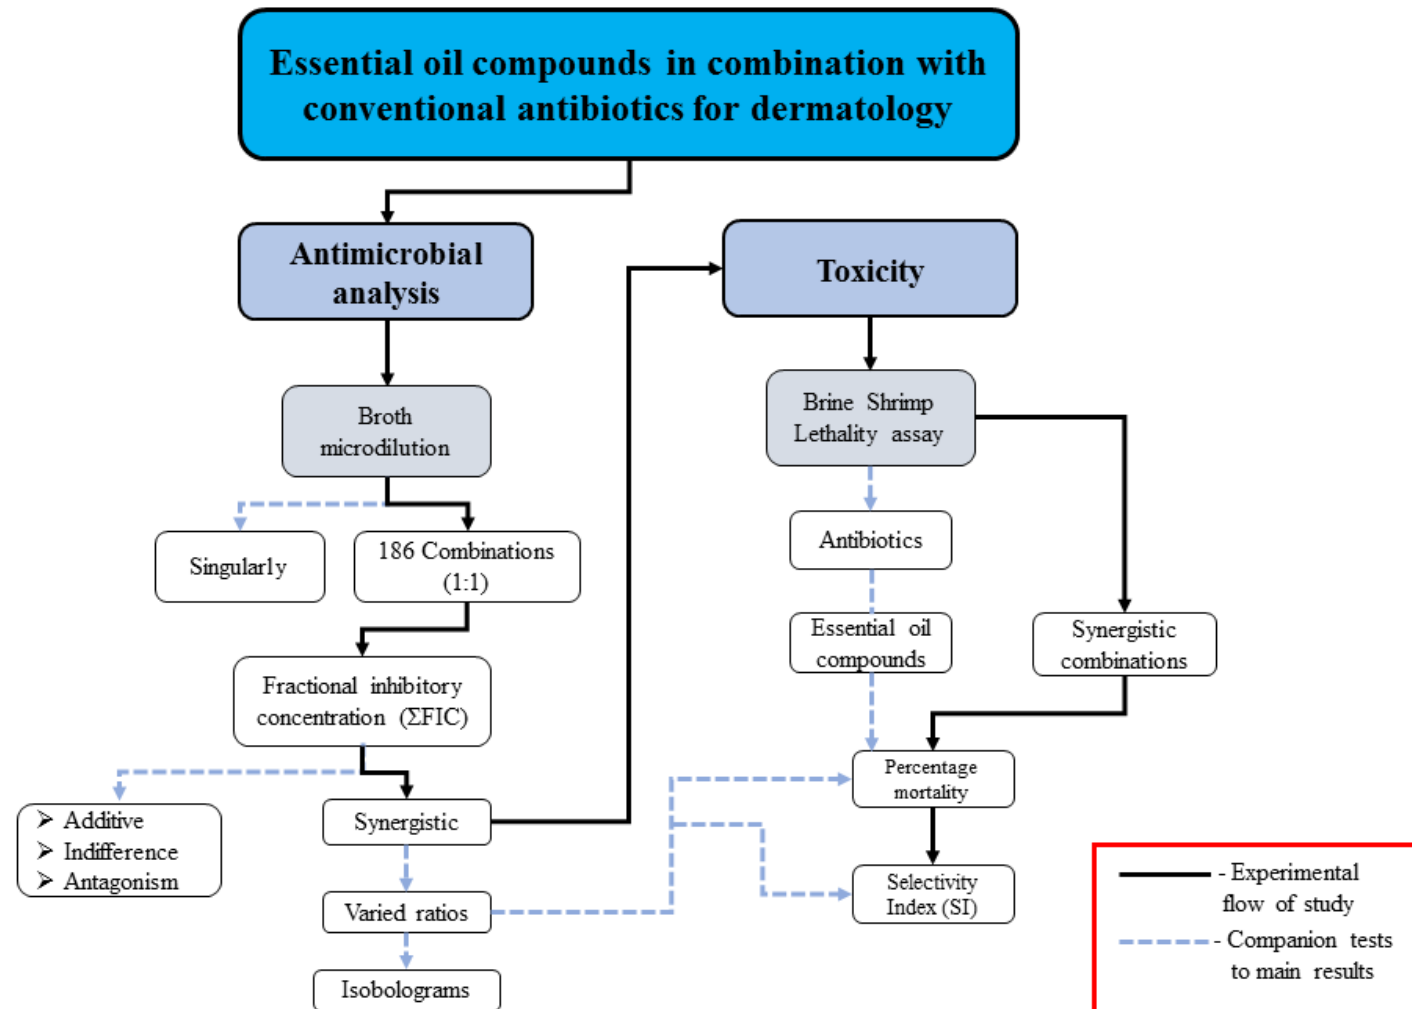

Supplement: s1 [file s1]
